# Supplementary material
Source: PubMed Central journal article supplement (PMC7000300)
Supplement: NIHMS1532988-supplement-1.pdf [file NIHMS1532988-supplement-1.pdf]

## **SUPPLEMENTARY MATERIALS**

### **SCLEROSING EPITHELIOID MESENCHYMAL NEOPLASM**

#### **A PROPOSED NEW ENTITY**

Basturk et al.

Supplementary Figure 1

Supplementary Tables 1-5

## Supplementary Figure 1

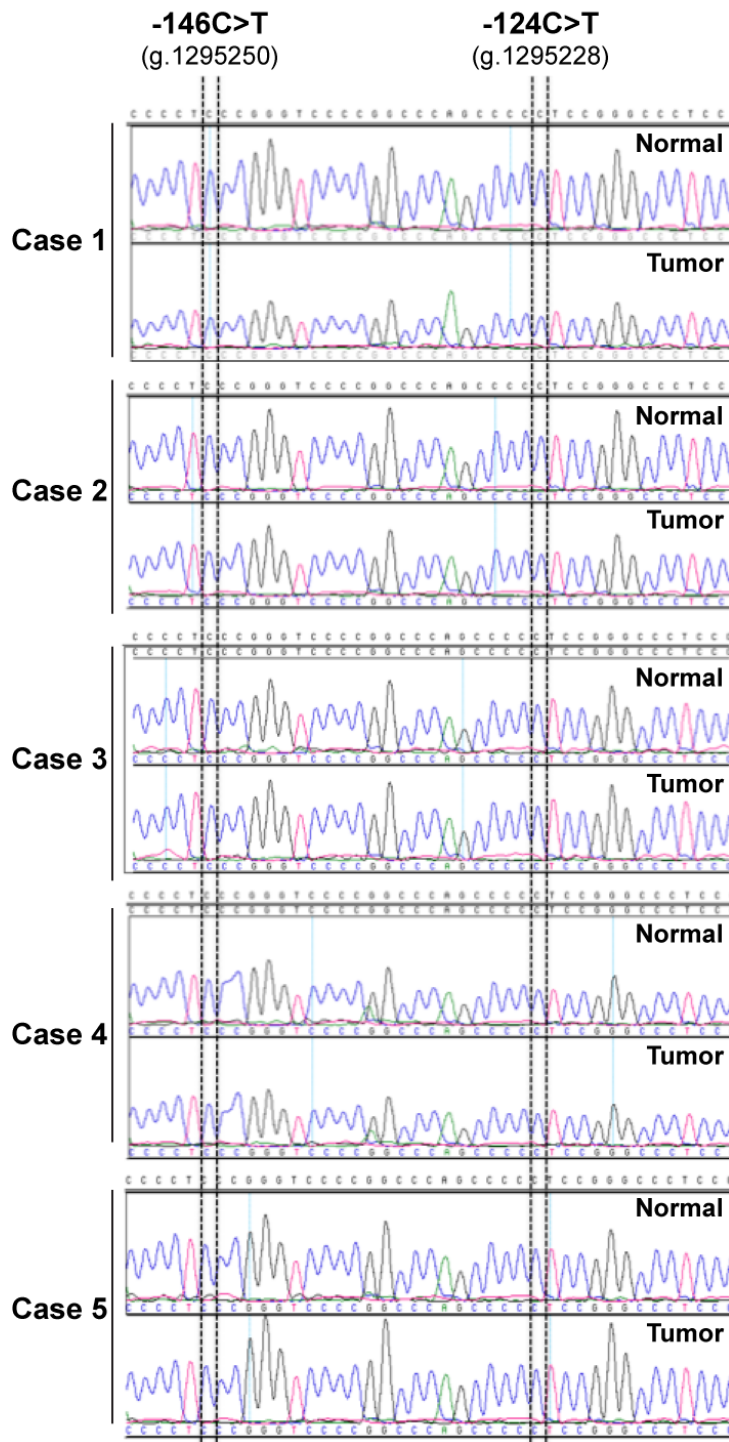

**Supplementary Figure 1:** *TERT* promoter mutation assessment using Sanger sequencing. Representative Sanger sequence electropherograms of the *TERT* promoter region encompassing the -124C>T and -146C>T hotspot sites in both tumor and matched normal samples.

**Supplementary Table 1.** List of Antibody Sources

| <b>Antibody</b>  | <b>Source</b>     | <b>Dilution</b> | <b>Pretreatment</b>  |
|------------------|-------------------|-----------------|----------------------|
| AE1:AE3          | BioGenex          | 1:2K            | CC1 (Ventana)        |
| CK18             | Dako              | 1:1K            | CC1 (Ventana)        |
| CD99             | Biolegend         | 1:400           | CC1(Ventana)         |
| Vimentin         | Dako              | 1:1K            | CC1(Ventana)         |
| Chromogranin     | Dako              | 1:2K            | CC1 (Ventana)        |
| Synaptophysin    | Dako              | 1:800           | CC1 (Ventana)        |
| PR               | Ventana           | 1:2             | CC1 (Ventana)        |
| CD10             | Ventana           | 1:2             | CC1 (Ventana)        |
| $\beta$ -catenin | B.D. Transduction | 1:500           | CC1 (Ventana)        |
| Trypsin          | BioDesign         | 1:3K            | Protease 1 (Ventana) |
| Chymotrypsin     | BioDesign         | 1:3K            | Protease I (Ventana) |
| TTF1             | Dako              | 1:100           | CC1Ventana           |
| HepPar-1         | Dako              | 1:2K            | CC1 (Ventana)        |
| MUC4             | Santa Cruz        | 1:2K            | ER2 (BOND RX)        |
| Desmin           | Dako              | 1:1K            | CC1 (Ventana)        |
| Myogenin         | Ventana           | Prediluted      | CC1 (Ventana)        |
| INI1 (BAF-47)    | BD Transduction   | 1 :500          | ER2 (BOND RX)        |
| CD117            | Dako              | 1:2K            | CC1 (Ventana)        |
| DOG1             | Ventana           | Predilute       | CC1 (Ventana)        |
| S100             | Dako              | 1:2K            | CC1 (Ventana)        |
| HMB45            | Dako              | 1:100           | CC1 (Ventana)        |
| Melan-A          | Dako              | 1:100           | ER2 (BOND RX)        |
| CD31             | Dako              | 1:700           | CC1 (Ventana)        |
| ERG              | AbCam             | 1:150           | CC1 (Ventana)        |
| CD21             | Dako              | 1:250           | Protease 1 (Ventana) |
| CD35             | Dako              | 1:100           | Protease 1 (Ventana) |
| CD45             | Dako              | 1:1500          | ER2 (BOND RX)        |
| BCL2             | Dako              | 1:200           | ER2 (BOND RX)        |
| ALK              | Ventana           | Prediluted      | CC1 (Ventana)        |
| CD34             | Dako              | 1:1K            | ER2 (BOND RX)        |
| STAT6            | Cell Marque       | 1:250           | ER2 (BOND RX)        |

**Supplementary Table 2. Summary of the Cases Analyzed**

| <b>Case</b> | <b>Age</b> | <b>Sex</b> | <b>Size (cm)</b> | <b>Site</b> | <b>Type of Surgery</b>       | <b>Outcome (months)</b> | <b>Whole Exome Sequencing</b> | <b>RNA-Sequencing</b> | <b>Archer FusionPlex</b> | <b>Methylation Profiling</b> | <b>TERT Promoter Mutation Analysis</b> |
|-------------|------------|------------|------------------|-------------|------------------------------|-------------------------|-------------------------------|-----------------------|--------------------------|------------------------------|----------------------------------------|
| <b>1</b>    | <b>30</b>  | <b>F</b>   | <b>1.8</b>       | <b>Head</b> | <b>Whipple</b>               | <b>NED (80)</b>         | <b>Yes</b>                    | <b>Yes</b>            | <b>Yes</b>               | <b>Yes</b>                   | <b>Yes</b>                             |
| <b>2</b>    | <b>26</b>  | <b>F</b>   | <b>1.5</b>       | <b>Body</b> | <b>Distal pancreatectomy</b> | <b>NED (53)</b>         | <b>Yes</b>                    | <b>Yes</b>            | <b>Yes</b>               | <b>Yes</b>                   | <b>Yes</b>                             |
| <b>3</b>    | <b>46</b>  | <b>F</b>   | <b>1.3</b>       | <b>Neck</b> | <b>Excision</b>              | <b>NED (80)</b>         | <b>Failed sequencing</b>      | <b>No</b>             | <b>Failed sequencing</b> | <b>No</b>                    | <b>Yes</b>                             |
| <b>4</b>    | <b>57</b>  | <b>F</b>   | <b>N/A</b>       | <b>Neck</b> | <b>Excision</b>              | <b>NED (49)</b>         | <b>Yes</b>                    | <b>Yes</b>            | <b>Yes</b>               | <b>Yes</b>                   | <b>Yes</b>                             |
| <b>5</b>    | <b>51</b>  | <b>F</b>   | <b>1.6</b>       | <b>Tail</b> | <b>Distal pancreatectomy</b> | <b>NED (94)</b>         | <b>Yes</b>                    | <b>Yes</b>            | <b>Yes</b>               | <b>Yes</b>                   | <b>Yes</b>                             |
| <b>6</b>    | <b>75</b>  | <b>M</b>   | <b>5.0</b>       | <b>Head</b> | <b>Whipple</b>               | <b>NED (24)</b>         | <b>No</b>                     | <b>Yes</b>            | <b>Yes</b>               | <b>Yes</b>                   | <b>No</b>                              |
| <b>7</b>    | <b>28</b>  | <b>M</b>   | <b>2.5</b>       | <b>Tail</b> | <b>Distal pancreatectomy</b> | <b>NED (19)</b>         | <b>No</b>                     | <b>Yes</b>            | <b>No</b>                | <b>Yes</b>                   | <b>No</b>                              |
| <b>8</b>    | <b>29</b>  | <b>F</b>   | <b>5.8</b>       | <b>Head</b> | <b>Whipple</b>               | <b>NED (8)</b>          | <b>No</b>                     | <b>No</b>             | <b>No</b>                | <b>No</b>                    | <b>No</b>                              |

**NED: No evidence of disease, M: Male, F: Female**

**Supplementary Table 3: Whole Exome Sequencing Statistics**

| <b>Sample ID</b>     | <b>Target Territory</b> | <b>Total Reads</b> | <b>Mean Target Coverage (X)</b> | <b>Percent Target Bases 2X</b> | <b>Percent Target Bases 20X</b> | <b>Percent Target Bases 50X</b> | <b>Percent Target Bases 100X</b> |
|----------------------|-------------------------|--------------------|---------------------------------|--------------------------------|---------------------------------|---------------------------------|----------------------------------|
| <b>Case 1 Tumor</b>  | 51189318                | 159363872          | 188,7                           | 0,997319                       | 0,98791                         | 0,955375                        | 0,827839                         |
| <b>Case 1 Normal</b> | 51189318                | 126707046          | 169,1                           | 0,997683                       | 0,985519                        | 0,937057                        | 0,774402                         |
| <b>Case 2 Tumor</b>  | 51189318                | 165483550          | 179,9                           | 0,997606                       | 0,984639                        | 0,934641                        | 0,776301                         |
| <b>Case 2 Normal</b> | 51189318                | 117884140          | 99,9                            | 0,996391                       | 0,946146                        | 0,795804                        | 0,452161                         |
| <b>Case 4 Tumor</b>  | 51189318                | 160857195          | 210,6                           | 0,997744                       | 0,987486                        | 0,951548                        | 0,842403                         |
| <b>Case 4 Normal</b> | 51189318                | 124572297          | 168,6                           | 0,997673                       | 0,972803                        | 0,907256                        | 0,735289                         |
| <b>Case 5 Tumor</b>  | 51189318                | 160778048          | 215,7                           | 0,997976                       | 0,989503                        | 0,957902                        | 0,854018                         |
| <b>Case 5 Normal</b> | 51189318                | 160966246          | 195,4                           | 0,997863                       | 0,988541                        | 0,954148                        | 0,832857                         |

**Supplementary Table 4. MSKCC-Solid Fusion Panel**

| <b>Target name</b> | <b>NCBI_reference sequence</b> | <b>Target_exons</b>                                    | <b>Direction</b> | <b>Assay_type</b>         |
|--------------------|--------------------------------|--------------------------------------------------------|------------------|---------------------------|
| ALK                | NM_004304                      | 19,20,21,22                                            | 5'               | fusion                    |
| ALK                | NM_004304                      | C1156Y, G1202R, D1203N, S1206Y, F1174L, L1196M, G1269A | N/A              | mutation                  |
| BCOR               | NM_001123385                   | 7,8                                                    | 5'               | fusion                    |
| BCOR               | NM_001123385                   | 7,14,15                                                | 3'               | fusion                    |
| BRAF               | NM_004333                      | 7, 8, 9, 10, 11, 12                                    | 5'               | fusion                    |
| BRAF               | NM_004333                      | 7, 8                                                   | 3'               | fusion                    |
| BRAF               | NM_004333                      | 15                                                     |                  | V600E                     |
| BRAF               | NM_004333                      | 16                                                     | 5'               | splice variant            |
| BRAF               | NM_004333                      | 1,2,3,13                                               | 3'               | splice variant            |
| CAMTA1             | NM_015215                      | 8,9,10                                                 | 5'               | fusion                    |
| CCNB3              | NM_033031                      | 2,3,4,5,6                                              | 5'               | fusion                    |
| CIC                | NM_015125                      | 19,20                                                  | 3'               | fusion                    |
| COL6A3             | NM_004369.2                    | 8,9,10,11                                              | 3'               | fusion                    |
| DNAJB1             | NM_006145                      | 1,2                                                    | 3'               | fusion                    |
| EGFR               | NM_005228                      | 1                                                      | 3'               | (2-7 exon skipping event) |
| EGFR               | NM_005228                      | 24, 25                                                 | 3'               | fusion                    |
| EGFR               | NM_005228                      | 7,8,9,16,20                                            | 5'               | fusion                    |
| EPC1               | NM_025209                      | 9,10,11                                                | 3'               | fusion                    |
| ERBB2              | NM_004448                      | 23, 24, 25, 26                                         | 3'               | fusion                    |
| ERBB2              | NM_004448                      | 4,5                                                    | 5'               | fusion                    |
| ERG                | NM_004449                      | 2, 3, 4, 5, 6, 7, 8, 9, 10, 11                         | 5'               | fusion                    |
| ETV6               | NM_001987                      | 1,2,3,4,5,6                                            | 3'               | fusion                    |
| ETV6               | NM_001987                      | 2,3,5,6,7                                              | 5'               | fusion                    |
| EWSR1              | NM_005243                      | 4,5,6,7,8,9,10,11,12,13                                | 3'               | fusion                    |
| FGFR1              | NM_015850                      | 2,8,9,10                                               | 5'               | fusion                    |
| FGFR1              | NM_015850                      | 17                                                     | 3'               | fusion                    |
| FGFR2              | NM_000141.4                    | 16, 17                                                 | 3'               | fusion                    |
| FGFR2              | NM_000141.4                    | 2,8,9,10                                               | 5'               | fusion                    |
| FGFR3              | NM_000142                      | 8, 9, 10                                               | 5'               | fusion                    |
| FGFR3              | NM_000142                      | 16, 17, intron 18                                      | 3'               | fusion                    |
| FOSB               | NM_006732.2                    | 1,2                                                    | 5'               | fusion                    |
| FOXO1              | NM_002015                      | 1,2,3                                                  | 5'               | fusion                    |
| FOXO1              | NM_002015                      | 1,2,3                                                  | 3'               | fusion                    |
| FUS                | NM_004960                      | 4,5,6,7,8,9,10,11,14                                   | 3'               | fusion                    |
| GLI1               | NM_005269                      | 4,5,6,7                                                | 5'               | fusion                    |
| GLI1               | NM_005269                      | 4,5,6,7                                                | 3'               | fusion                    |
| GRB7               | NM_005310                      | 10, 11, 12                                             | 5'               | fusion                    |
| HMGA2              | NM_003483                      | 1,2,3,4,5                                              | 3'               | fusion                    |

| Target name | NCBI_reference sequence | Target_exons                    | Direction | Assay_type           |
|-------------|-------------------------|---------------------------------|-----------|----------------------|
| JAK3        | NM_000215               | 10,11,12,17,18,19               | 5'        | fusion               |
| JAZF1       | NM_175061               | 2,3,4                           | 3'        | fusion               |
| KIT         | NM_000222.2             | 1                               | 3'        | fusion               |
| MAML2       | NM_032427               | 2,3                             | 5'        | fusion               |
| MAML2       | NM_032427               | 2                               | 3'        | fusion               |
| MEAF6       | NM_001270875            | 4,5                             | 3'        | fusion               |
| MET         | NM_000245               | 13                              | 3'        | fusion               |
| MET         | NM_000245               | 2, 13, 14, 15, 16               | 5'        | fusion               |
| MGEA5       | NM_012215               | 12,13                           | 5'        | fusion               |
| MKL2        | NM_014048               | 11,12,13                        | 5'        | fusion               |
| MYB         | NM_001130173            | 7, 8, 9, 11, 12, 13, 14, 15, 16 | 3'        | fusion               |
| NCOA1       | NM_147223               | 12,13,14,15                     | 5'        | fusion               |
| NCOA2       | NM_006540               | 11,12,13,14                     | 5'        | fusion               |
| NOTCH1      | NM_017617.3             | 26, 27, 28, 29                  | 5'        | fusion               |
| NOTCH1      | NM_017617.3             | 2, 4, 29, 30, 31                | 3'        | fusion               |
| NOTCH2      | NM_024408               | 26, 27, 28                      | 5'        | fusion               |
| NOTCH2      | NM_024408               | 5, 6, 7                         | 3'        | fusion               |
| NR4A3       | NM_173200               | 3,4                             | 5'        | fusion               |
| NRG1        | NM_004495               | 1, 2, 3, 6                      | 5'        | fusion               |
| NTRK1       | NM_002529               | 8, 10, 11, 12, 13,              | 5'        | fusion               |
| NTRK2       | NM_006180               | 11,12,13,14,15,16,17            | 5'        | fusion               |
| NTRK3       | NM_002530               | 13,14,15,16                     | 5'        | fusion               |
| NTRK3       | NM_002530               | 13,14,15                        | 3'        | fusion               |
| NTRK3       | NM_001007156            | 15                              | 5'        | fusion               |
| PDGFB       | NM_002608               | 2,3                             | 5'        | fusion               |
| PDGFRA      | NM_006206.4             | 10, 11,12,13,14                 | 5'        | fusion               |
| PDGFRA      | NM_006206.4             | 7                               | 3'        | (exons 8,9 deletion) |
| PHF1        | NM_024165               | 1,2                             | 5'        | fusion               |
| PIK3CA      | NM_006218               | 2                               | 5'        | fusion               |
| PLAG1       | NM_002655               | 1,2,3,4                         | 5'        | fusion               |
| PPARG       | NM_015869               | 1,2,3                           | 5'        | fusion               |
| PRKACA      | NM_002730               | 2                               | 5'        | fusion               |
| RET         | NM_020975               | 8,9,10,11,12,13                 | 5'        | fusion               |
| RET         | NM_020975               | V804M/L                         | N/A       | mutation             |
| ROS1        | NM_002944               | 31,32,33,34,35,36,37            | 5'        | fusion               |
| RSPO2       | NM_178565               | 1,2                             | 5'        | fusion               |
| RSPO3       | NM_032784               | 2                               | 5'        | fusion               |
| SS18        | NM_001007559            | 10,11                           | 5'        | fusion               |
| SS18        | NM_001007559            | 4,5,6,8,9,10                    | 3'        | fusion               |
| STAT6       | NM_001178078            | 1,2,3,4,5,6,7,16,17,18,19       | 5'        | fusion               |

| <b>Target_name</b> | <b>NCBI_reference_sequence</b> | <b>Target_exons</b> | <b>Direction</b> | <b>Assay_type</b> |
|--------------------|--------------------------------|---------------------|------------------|-------------------|
| TAF15              | NM_139215                      | 6,7                 | 5'               | fusion            |
| TAF15              | NM_139215                      | 5,6,7               | 3'               | fusion            |
| TCF12              | NM_207036                      | 4,5,6               | 3'               | fusion            |
| TFE3               | NM_006521                      | 3,4,5,6             | 5'               | fusion            |
| TFEB               | NM_007162                      | 1,2,3,4             | 5'               | fusion            |
| TFG                | NM_006070                      | 4,5,6,7             | 3'               | fusion            |
| TFG                | NM_006070                      | 6                   | 5'               | fusion            |
| TMPRSS2            | NM_005656                      | 1,2,3,4,5,6         | 3'               | fusion            |
| TMPRSS2            | NM_001135099                   | 1                   | 3'               | fusion            |
| USP6               | NM_004505                      | 1,2,3               | 5'               | fusion            |
| YWHAE              | NM_006761                      | 5                   | 3'               | fusion            |



Supplementary Table 5: Non-synonymous somatic mutations identified in sclerosing epithelioid mesenchymal neoplasm of the pancreas using whole-exome sequencing

| Case ID | Chromosome | Position  | Ref Allele | Alt Allele | Gene Symbol | AA Change      | Variant Class     | Tumor MAF   | Normal MAF  | Tumor Depth | Normal Depth | LOH | Hotspot | Cancer Cell Fraction | Clonality | Pathogenicity     | Mutation Taster | Provean | FATHMM | CHASM     | Cancer gene (Census, Kandath, Lawrence) |
|---------|------------|-----------|------------|------------|-------------|----------------|-------------------|-------------|-------------|-------------|--------------|-----|---------|----------------------|-----------|-------------------|-----------------|---------|--------|-----------|-----------------------------------------|
| Case 1  | 5          | 149216399 | ACAG       | A          | PPARGC1B    | p.S799del      | In_Frame_Del      | 0,1         | 0           | 60          | 75           | No  | No      | 0,34                 | Subclonal | Passenger         | D               | .       | .      | .         | .                                       |
| Case 1  | 1          | 109839676 | G          | A          | MYBPHL      | p.S189F        | Missense_Mutation | 0,057553957 | 0           | 139         | 140          | No  | No      | 0,2                  | Subclonal | Passenger         | D               | D       | T      | Passenger | .                                       |
| Case 1  | 1          | 220921886 | A          | G          | MARCH2      | p.S5G          | Missense_Mutation | 0,303030303 | 0           | 33          | 21           | No  | No      | 1                    | Clonal    | Passenger         | N               | N       | T      | Passenger | .                                       |
| Case 1  | 19         | 45719334  | A          | G          | EXOC3L2     | p.I313T        | Missense_Mutation | 0,27027027  | 0           | 37          | 47           | No  | No      | 0,92                 | Clonal    | Passenger         | D               | D       | T      | Passenger | .                                       |
| Case 1  | 20         | 2945612   | C          | G          | PTPRA       | p.S60C         | Missense_Mutation | 0,316326531 | 0           | 98          | 87           | No  | No      | 1                    | Clonal    | Passenger         | D               | N       | T      | Passenger | .                                       |
| Case 1  | 4          | 88535868  | A          | G          | DSPP        | p.N685S        | Missense_Mutation | 0,05        | 0,006060606 | 180         | 165          | No  | No      | 0,17                 | Subclonal | Passenger         | N               | N       | D      | Passenger | .                                       |
| Case 1  | 5          | 79550736  | C          | G          | MSH3        | p.P64A         | Missense_Mutation | 0,208791209 | 0,040816327 | 91          | 98           | No  | No      | 0,71                 | Subclonal | Passenger         | N               | N       | D      | Passenger | .                                       |
| Case 1  | 8          | 143396416 | C          | T          | TSNARE1     | p.R341Q        | Missense_Mutation | 0,316831683 | 0           | 101         | 109          | No  | No      | 1                    | Clonal    | Passenger         | N               | D       | T      | Passenger | .                                       |
| Case 2  | 1          | 169080619 | C          | G          | ATP1B1      | p.L37V         | Missense_Mutation | 0,39516129  | 0           | 124         | 27           | No  | No      | 1                    | Clonal    | Passenger         | D               | N       | T      | Passenger | .                                       |
| Case 2  | 11         | 67250716  | A          | T          | AIP         | p.Q29H         | Missense_Mutation | 0,253623188 | 0           | 138         | 66           | No  | No      | 1                    | Clonal    | Likely pathogenic | D               | N       | D      | Passenger | .                                       |
| Case 2  | 13         | 113174211 | G          | A          | TUBGCP3     | p.R624W        | Missense_Mutation | 0,2         | 0           | 15          | 13           | No  | No      | 0,84                 | Clonal    | Passenger         | D               | D       | T      | Passenger | .                                       |
| Case 2  | 19         | 39961096  | G          | A          | SUPT5H      | p.G537D        | Missense_Mutation | 0,195121951 | 0           | 123         | 98           | No  | No      | 0,82                 | Clonal    | Likely pathogenic | D               | D       | .      | Driver    | .                                       |
| Case 2  | 2          | 207632160 | C          | A          | FASTKD2     | p.T248N        | Missense_Mutation | 0,263157895 | 0           | 114         | 56           | No  | No      | 1                    | Clonal    | Passenger         | D               | D       | T      | Passenger | .                                       |
| Case 2  | 2          | 31572613  | C          | T          | XDH         | p.E970K        | Missense_Mutation | 0,087591241 | 0           | 137         | 63           | No  | No      | 0,37                 | Subclonal | Passenger         | D               | N       | T      | Passenger | .                                       |
| Case 2  | 6          | 83823058  | C          | T          | DOPEY1      | p.T233I        | Missense_Mutation | 0,238095238 | 0,026315789 | 84          | 38           | No  | No      | 1                    | Clonal    | Passenger         | D               | N       | T      | Passenger | .                                       |
| Case 2  | 7          | 139285169 | G          | A          | HIPK2       | p.S810F        | Missense_Mutation | 0,32        | 0           | 25          | 13           | No  | No      | 1                    | Clonal    | Passenger         | D               | N       | T      | Passenger | .                                       |
| Case 4  | 19         | 17303578  | GCAAGCCC   | G          | MYO9B       | p.Q946Cfs*32   | Frame_Shift_Del   | 0,171428571 | 0           | 35          | 36           | No  | No      | 1                    | Clonal    | Passenger         | .               | .       | .      | .         | .                                       |
| Case 4  | 3          | 158523190 | G          | GA         | MFS1        | p.A135Dfs*32   | Frame_Shift_Ins   | 0,303797468 | 0           | 79          | 46           | No  | No      | 1                    | Clonal    | Passenger         | .               | .       | .      | .         | .                                       |
| Case 4  | 13         | 103268760 | AAAAATC    | A          | TPP2        | p.K136_L137del | In_Frame_Del      | 0,08        | 0           | 100         | 90           | No  | No      | 0,83                 | Clonal    | Passenger         | .               | .       | .      | .         | .                                       |
| Case 4  | 1          | 10397468  | T          | G          | KIF1B       | p.M1054R       | Missense_Mutation | 0,080188679 | 0           | 212         | 149          | No  | No      | 0,83                 | Clonal    | Passenger         | D               | N       | T      | Passenger | .                                       |
| Case 4  | 1          | 152552214 | T          | C          | LCE3D       | p.R67G         | Missense_Mutation | 0,298507463 | 0           | 134         | 176          | No  | No      | 1                    | Clonal    | Passenger         | N               | N       | T      | Passenger | .                                       |
| Case 4  | 1          | 210273703 | A          | G          | SYT14       | p.K399R        | Missense_Mutation | 0,043478261 | 0           | 92          | 39           | No  | No      | 0,45                 | Subclonal | Passenger         | D               | N       | T      | Passenger | .                                       |
| Case 4  | 1          | 235872551 | G          | C          | LYST        | p.P3328R       | Missense_Mutation | 0,285714286 | 0           | 259         | 168          | No  | No      | 1                    | Clonal    | Passenger         | D               | D       | T      | Passenger | .                                       |
| Case 4  | 1          | 9322316   | C          | A          | H6PD        | p.S315Y        | Missense_Mutation | 0,244094488 | 0           | 127         | 111          | No  | No      | 1                    | Clonal    | Passenger         | N               | D       | D      | Passenger | .                                       |
| Case 4  | 11         | 118629499 | T          | C          | DDX6        | p.N326S        | Missense_Mutation | 0,104477612 | 0           | 67          | 38           | No  | No      | 1                    | Clonal    | Passenger         | D               | D       | T      | Passenger | TRUE (Census)                           |
| Case 4  | 11         | 124620727 | C          | T          | VSIG2       | p.A104T        | Missense_Mutation | 0,056451613 | 0           | 124         | 79           | No  | No      | 0,58                 | Subclonal | Passenger         | D               | D       | T      | Passenger | .                                       |
| Case 4  | 11         | 6479504   | C          | A          | TRIM3       | p.A52S         | Missense_Mutation | 0,05511811  | 0           | 127         | 103          | No  | No      | 0,57                 | Subclonal | Likely pathogenic | D               | N       | D      | Passenger | .                                       |
| Case 4  | 12         | 42631435  | T          | C          | YAF2        | p.M40V         | Missense_Mutation | 0,040462428 | 0           | 173         | 170          | No  | No      | 0,42                 | Subclonal | Passenger         | D               | N       | T      | Passenger | .                                       |
| Case 4  | 14         | 47120429  | A          | G          | RPL10L      | p.W171R        | Missense_Mutation | 0,278074866 | 0           | 187         | 184          | No  | No      | 1                    | Clonal    | Passenger         | D               | D       | T      | Passenger | .                                       |
| Case 4  | 15         | 48807632  | A          | T          | FBN1        | p.C474S        | Missense_Mutation | 0,069651741 | 0,00621118  | 201         | 161          | No  | No      | 0,72                 | Subclonal | Likely pathogenic | D               | D       | D      | Driver    | .                                       |
| Case 4  | 17         | 79857882  | G          | A          | ANAPC11     | p.R166H        | Missense_Mutation | 0,253333933 | 0           | 150         | 136          | No  | No      | 1                    | Clonal    | Passenger         | D               | N       | .      | Passenger | .                                       |
| Case 4  | 17         | 916353    | T          | C          | ABR         | p.M615V        | Missense_Mutation | 0,089108911 | 0,011363636 | 101         | 88           | No  | No      | 0,92                 | Clonal    | Passenger         | D               | N       | T      | Passenger | .                                       |
| Case 4  | 18         | 12264319  | T          | A          | CIDEA       | p.L66H         | Missense_Mutation | 0,059233449 | 0           | 287         | 251          | No  | No      | 0,61                 | Subclonal | Passenger         | D               | D       | T      | Passenger | .                                       |
| Case 4  | 18         | 8796237   | A          | T          | SOGA2       | p.E673V        | Missense_Mutation | 0,074074074 | 0           | 135         | 114          | No  | No      | 0,76                 | Clonal    | Passenger         | D               | D       | T      | Passenger | .                                       |
| Case 4  | 2          | 162175353 | G          | A          | PSMD14      | p.R6K          | Missense_Mutation | 0,323353293 | 0           | 167         | 116          | No  | No      | 1                    | Clonal    | Passenger         | D               | N       | .      | Passenger | .                                       |
| Case 4  | 20         | 56078582  | T          | C          | CTCF        | p.T584A        | Missense_Mutation | 0,038461538 | 0           | 312         | 251          | No  | No      | 0,4                  | Subclonal | Passenger         | N               | N       | T      | Passenger | .                                       |
| Case 4  | 23         | 117880972 | G          | T          | IL13RA1     | p.C95F         | Missense_Mutation | 0,245033113 | 0,008196721 | 151         | 122          | No  | No      | 1                    | Clonal    | Likely pathogenic | D               | D       | D      | Passenger | .                                       |
| Case 4  | 4          | 89649797  | C          | T          | FAM13A      | p.E987K        | Missense_Mutation | 0,301587302 | 0           | 189         | 142          | No  | No      | 1                    | Clonal    | Passenger         | D               | D       | T      | Passenger | .                                       |
| Case 4  | 5          | 140755031 | G          | A          | PCDHGA6     | p.V461I        | Missense_Mutation | 0,254847645 | 0           | 361         | 344          | No  | No      | 1                    | Clonal    | Passenger         | N               | N       | T      | Passenger | .                                       |
| Case 4  | 7          | 1538115   | G          | C          | INTS1       | p.A453G        | Missense_Mutation | 0,053571429 | 0           | 112         | 136          | No  | No      | 0,55                 | Subclonal | Passenger         | D               | D       | T      | Passenger | .                                       |
| Case 4  | 8          | 105001556 | G          | A          | RIMS2       | p.R984Q        | Missense_Mutation | 0,080536913 | 0           | 149         | 116          | No  | No      | 0,83                 | Clonal    | Passenger         | D               | D       | T      | Passenger | .                                       |
| Case 4  | 3          | 114069908 | G          | C          | ZBTB20      | p.Y339*        | Nonsense_Mutation | 0,071856287 | 0           | 334         | 317          | No  | No      | 0,74                 | Subclonal | Passenger         | A               | .       | .      | .         | .                                       |
| Case 5  | 6          | 1390977   | TCAC       | T          | FOXF2       | p.H272del      | In_Frame_Del      | 0,142857143 | 0           | 49          | 46           | No  | No      | 1                    | Clonal    | Passenger         | D               | .       | .      | .         | .                                       |
| Case 5  | 1          | 40363301  | C          | T          | MYCL        | p.V310M        | Missense_Mutation | 0,063636364 | 0,004405286 | 220         | 227          | No  | No      | 0,7                  | Subclonal | Passenger         | D               | N       | T      | Passenger | .                                       |
| Case 5  | 11         | 55607204  | T          | C          | OR5D16      | p.I326T        | Missense_Mutation | 0,1         | 0           | 120         | 158          | No  | No      | 1                    | Clonal    | Passenger         | N               | N       | T      | Passenger | .                                       |
| Case 5  | 14         | 47613364  | G          | A          | MDGA2       | p.R237W        | Missense_Mutation | 0,111111111 | 0           | 117         | 90           | No  | No      | 1                    | Clonal    | Passenger         | D               | .       | T      | Passenger | .                                       |
| Case 5  | 16         | 28507445  | G          | C          | APOBR       | p.E361D        | Missense_Mutation | 0,113207547 | 0           | 53          | 54           | No  | No      | 1                    | Clonal    | Passenger         | N               | N       | T      | Passenger | .                                       |
| Case 5  | 19         | 13041497  | G          | A          | FARSA       | p.R72W         | Missense_Mutation | 0,06        | 0,004273504 | 250         | 234          | No  | No      | 0,66                 | Subclonal | Passenger         | D               | D       | T      | Passenger | .                                       |
| Case 5  | 19         | 8400664   | G          | A          | KANK3       | p.P16L         | Missense_Mutation | 0,166666667 | 0           | 18          | 20           | No  | No      | 1                    | Clonal    | Passenger         | D               | N       | T      | Passenger | .                                       |
| Case 5  | 23         | 103268162 | G          | T          | H2BFWT      | p.A24D         | Missense_Mutation | 0,039130435 | 0,004366812 | 230         | 229          | No  | No      | 0,43                 | Subclonal | Passenger         | N               | N       | T      | Passenger | .                                       |
| Case 5  | 3          | 186256514 | C          | G          | CRYGS       | p.V170L        | Missense_Mutation | 0,032921811 | 0           | 243         | 204          | No  | No      | 0,36                 | Subclonal | Passenger         | N               | N       | T      | Passenger | .                                       |
| Case 5  | 3          | 25835620  | C          | A          | OXSM        | p.P339T        | Missense_Mutation | 0,098591549 | 0           | 142         | 130          | No  | No      | 1                    | Clonal    | Passenger         | N               | D       | .      | Passenger | .                                       |
| Case 5  | 6          | 46216564  | G          | C          | RCAN2       | p.R99G         | Missense_Mutation | 0,073529412 | 0           | 136         | 122          | No  | No      | 0,81                 | Clonal    | Likely pathogenic | D               | D       | .      | Driver    | .                                       |

Supplementary Table 6. Fusion candidate genes and/or readthroughs identified by RNA-sequencing analysis of sclerosing epithelioid mesenchymal neoplasm of the pancreas.

| Case ID | Fusion Caller                                                                                 | 5' Gene      | 3' Gene      | 5' Mapping   | 3' Mapping    | Fusion Type       | Crossing Reads | Encompassing Reads | In Frame | Driver Probability (Oncofuse) | 5' Cancer Gene | 3' Cancer Gene |
|---------|-----------------------------------------------------------------------------------------------|--------------|--------------|--------------|---------------|-------------------|----------------|--------------------|----------|-------------------------------|----------------|----------------|
| Case 1  | STAR-Integrate                                                                                | TMF1         | EOGT         | 3:69072356-  | 3:69061905-   | Read_Through      | 3              | 2                  | No       | 0.115484304                   | No             | No             |
| Case 1  | Bowtie-Integrate, BWA-Integrate                                                               | D28390       | TUBA1A       | 12:49658967- | 12:49580616-  | Intra_Chromosomal | 16             | 14                 | Yes      | 0.000759567                   | No             | No             |
| Case 1  | Bowtie-Integrate, BWA-Integrate                                                               | D28390       | TUBA1B       | 12:49658967- | 12:49523505-  | Intra_Chromosomal | 17             | 9                  | Yes      | 0.00000785                    | No             | No             |
| Case 2  | STAR-Integrate, Bowtie-Integrate, BWA-Integrate, Bowtie-Fusioncatcher                         | ANXA2        | NOP10        | 15:60674541- | 15:34634309-  | Intra_Chromosomal | 10             | 8                  | No       | 0.005854542                   | No             | No             |
| Case 4  | STAR-Integrate, BWA-Integrate                                                                 | GRM5         | NCL          | 11:88345998- | 2:232320629-  | Intra_Chromosomal | 10             | 2                  | No       | 0.44815709                    | No             | No             |
| Case 4  | STAR-Integrate                                                                                | FAM188A      | ITGA8        | 10:15839218- | 10:15699585-  | Read_Through      | 6              | 17                 | Yes      | 0.299599166                   | No             | No             |
| Case 4  | MAPSplice                                                                                     | TMEM222      | SNORA20,TCP1 | 1:27651816+  | 6:160201405-  | Intra_Chromosomal | 3              | 10                 | Yes      | 0.208586963                   | No             | No             |
| Case 4  | Bowtie-Integrate, BWA-Integrate                                                               | FBXO25       | FAM157A      | 8:385707+    | 3:197907626+  | Inter_Chromosomal | 2              | 2                  | No       | 0.07415937                    | No             | No             |
| Case 4  | Bowtie-Integrate, BWA-Integrate                                                               | GATSL2       | GTF2I        | 7:74867229-  | 7:74143124+   | Intra_Chromosomal | 17             | 9                  | No       | 0.004563057                   | No             | No             |
| Case 4  | STAR-Fusion                                                                                   | CLPS         | CPA1         | 6:35764982-  | 7:130027665+  | Intra_Chromosomal | 2              | 1                  | No       | 0.000532411                   | No             | No             |
| Case 5  | STAR-Fusion                                                                                   | RN7SL4P      | RN7SL166P    | 3:15780256+  | 13:20311178-  | Intra_Chromosomal | 3              | 1                  | No       | 0.948277221                   | No             | No             |
| Case 5  | STAR-Integrate                                                                                | AMY2B        | PNLIP        | 1:104116558+ | 10:118318664+ | Inter_Chromosomal | 3              | 6                  | No       | 0.125810357                   | No             | No             |
| Case 5  | STAR-Integrate                                                                                | GRM5         | NCL          | 11:88345998- | 2:232320629-  | Inter_Chromosomal | 4              | 3                  | No       | 0.011146112                   | No             | No             |
| Case 5  | STAR-Integrate, BWA-Integrate                                                                 | CPA1         | CELA3B       | 7:130022050- | 1:22315755+   | Inter_Chromosomal | 2              | 6                  | No       | 0.004802719                   | No             | No             |
| Case 5  | STAR-Integrate                                                                                | CLPS         | AMY2A        | 6:35764978-  | 1:104163177+  | Inter_Chromosomal | 7              | 2                  | Yes      | 0.004125734                   | No             | No             |
| Case 5  | Bowtie-Integrate, BWA-Integrate                                                               | LOC100288142 | NBPF1        | 1:145316684- | 1:16892954-   | Intra_Chromosomal | 110            | 468                | No       | 0.000674527                   | No             | Yes            |
| Case 6  | STAR-Integrate, Bowtie-Integrate, BWA-Integrate, Bowtie-Fusioncatcher, MAPSplice, STAR-Fusion | KAT6B        | DNAH7        | 10:76603236+ | 2:196651895-  | Inter_Chromosomal | 4              | 17                 | Yes      | 0.985546392                   | Yes            | No             |
| Case 6  | STAR-Integrate, Bowtie-Integrate, BWA-Integrate, Bowtie-Fusioncatcher                         | UCK2         | ZMIZ1        | 1:165865567+ | 10:80878672+  | Inter_Chromosomal | 5              | 17                 | No       | 0.591263951                   | No             | No             |
| Case 6  | STAR-Integrate, Bowtie-Integrate, BWA-Integrate                                               | NFATC2       | NUTM2A       | 20:50051725- | 10:88992360+  | Inter_Chromosomal | 5              | 8                  | Yes      | 0.204184399                   | Yes            | Yes            |
| Case 6  | STAR-Integrate, Bowtie-Integrate, BWA-Integrate, Bowtie-Fusioncatcher                         | FAM210B      | PGAP1        | 20:54934247+ | 2:197767466-  | Inter_Chromosomal | 5              | 7                  | No       | 0.158507156                   | No             | No             |
| Case 6  | STAR-Integrate, Bowtie-Integrate, BWA-Integrate, Bowtie-Fusioncatcher                         | CAMK2G       | SNCG         | 10:75632748- | 10:88719390+  | Intra_Chromosomal | 10             | 9                  | No       | 0.027357488                   | No             | No             |
| Case 6  | MAPSplice, STAR-Fusion, STAR-Integrate                                                        | CAMK2G       | SNCG         | 10:75632747- | 10:88719390+  | Intra_Chromosomal | 7              | 10                 | Yes      | 0.027357488                   | No             | No             |
| Case 6  | Bowtie-Integrate, BWA-Integrate                                                               | MNAT1        | SLC38A6      | 14:61346653- | 14:61449226+  | Read_Through      | 2              | 2                  | No       | 0.000108277                   | No             | No             |
| Case 7  | STAR-Integrate, Bowtie-Integrate, BWA-Integrate, STAR-Fusion                                  | PANX1        | HEPHL1       | 11:93886796+ | 11:93815584+  | Intra_Chromosomal | 18             | 25                 | No       | 0.013503835                   | No             | No             |
| Case 7  | Bowtie-Integrate, BWA-Integrate                                                               | DTX2         | UPK3B        | 7:76133760+  | 7:76140972+   | Read_Through      | 2              | 4                  | Yes      | 0.006634333                   | No             | No             |
